# Supplementary material for: Anti-platelet aggregation of Panax notoginseng triol saponins by regulating GP1BA for ischemic stroke therapy
Source: PubMed Central journal article supplement (PMC7816336; doi:10.1186/s13020-021-00424-3), 2021-01-19
Supplement: 13020_2021_424_MOESM1_ESM.pdf [file 13020_2021_424_MOESM1_ESM.pdf]

**Additional file 1:** Figure of GP1BA and PAF in MCAO model by Western Blot

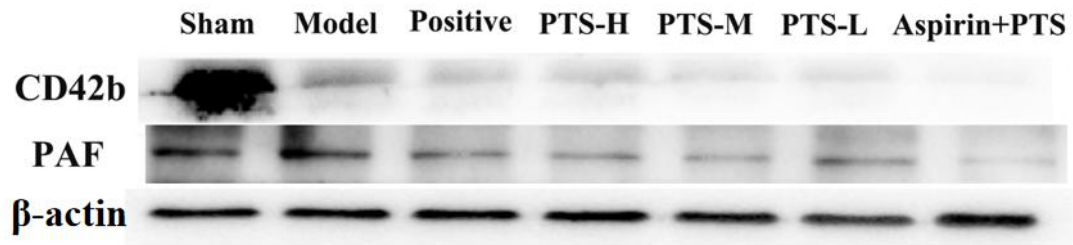

Notes: Effect of PTS on expression of GP1BA and PAF in each group at 22h after reperfusion were determined by Western Blot.  $\beta$ -actin was selected as a reference.
